# Supplementary material for: Biochar Decreases Fertilizer Leaching and Promotes Miscanthus Growth in Saline-Alkaline Soil
Source: MDPI journal article supplement (doi:10.3390/plants12203649), 2023-10-23
Supplement: s1 [file s1]

**Supplementary materials****Supplement Table S1.** The Shoot and Root length of miscanthus under different treatments.

|                   | CK    | BC2.0  | BC2.5 | CKF   | BCF2.0 | BCF2.5 |
|-------------------|-------|--------|-------|-------|--------|--------|
| Shoot Length (cm) | 33.93 | 103.93 | 95.30 | 48.30 | 128.80 | 127.93 |
| Root Length (cm)  | 11.50 | 42.40  | 41.27 | 13.43 | 52.43  | 51.00  |
